# Supplementary material for: Breathlessness dimensions association with physical and mental quality of life: the population based VASCOL study of elderly men
Source: HighWire-hosted journal article supplement (doi:10.1136/bmjresp-2021-000990), 2021-11-01
Supplement: bmjresp-2021-000990supp001_data_supplement.pdf [file bmjresp-2021-000990supp001_data_supplement.pdf]

**Table S1.** Comparison between people included and excluded in the analysis.

| Baseline characteristic at age 65               | Included in this analysis | Excluded due to missing data on variables in the returned survey | Excluded as did not participate in the survey |
|-------------------------------------------------|---------------------------|------------------------------------------------------------------|-----------------------------------------------|
| N                                               | 672                       | 235                                                              | 395                                           |
| Body mass index, mean (SD) (kg/m <sup>2</sup> ) | 28.2 (4.1)                | 27.9 (3.8)                                                       | 28.5 (4.4)                                    |
| FEV <sub>1</sub> , mean (SD) (%)                | 3.2 (0.6)                 | 3.2 (0.5)                                                        | 3.1 (0.6)                                     |
| FVC, mean (SD) (l)                              | 4.2 (0.7)                 | 4.2 (0.7)                                                        | 4.1 (0.8)                                     |
| Smoking status                                  |                           |                                                                  |                                               |
| Current smoker                                  | 72 (10.7%)                | 19 (8.1%)                                                        | 77 (19.5%)                                    |
| Former smoker                                   | 379 (56.4%)               | 135 (57.4%)                                                      | 193 (48.9%)                                   |
| Never smoked                                    | 221 (32.9%)               | 81 (34.5%)                                                       | 125 (31.6%)                                   |
| Packet years of smoking, mean (SD)              | 21.4 (18.2)               | 18.6 (16.1)                                                      | 27.1 (22.8)                                   |
| Angina pectoris                                 |                           |                                                                  |                                               |
| Yes                                             | 41 (6.1%)                 | 13 (5.5%)                                                        | 31 (7.8%)                                     |
| No                                              | 620 (92.3%)               | 218 (92.8%)                                                      | 357 (90.4%)                                   |
| Unknown                                         | 10 (1.5%)                 | 4 (1.7%)                                                         | 6 (1.5%)                                      |
| Missing                                         | 1 (0.1%)                  | 0 (0.0%)                                                         | 1 (0.3%)                                      |
| Stroke                                          |                           |                                                                  |                                               |
| Yes                                             | 18 (2.7%)                 | 5 (2.1%)                                                         | 19 (4.8%)                                     |
| No                                              | 648 (96.4%)               | 228 (97.0%)                                                      | 375 (94.9%)                                   |
| Unknown                                         | 5 (0.7%)                  | 2 (0.9%)                                                         | 0 (0.0%)                                      |
| Missing                                         | 1 (0.1%)                  | 0 (0.0%)                                                         | 1 (0.3%)                                      |
| Myocardial infarction                           |                           |                                                                  |                                               |
| Yes                                             | 34 (5.1%)                 | 10 (4.3%)                                                        | 30 (7.6%)                                     |
| No                                              | 631 (93.9%)               | 221 (94.0%)                                                      | 358 (90.6%)                                   |
| Unknown                                         | 6 (0.9%)                  | 3 (1.3%)                                                         | 6 (1.5%)                                      |
| Missing                                         | 1 (0.1%)                  | 1 (0.4%)                                                         | 1 (0.3%)                                      |
| Diabetes mellitus                               |                           |                                                                  |                                               |
| Yes                                             | 48 (7.1%)                 | 31 (13.2%)                                                       | 53 (13.4%)                                    |
| No                                              | 620 (92.3%)               | 203 (86.4%)                                                      | 340 (86.1%)                                   |
| Unknown                                         | 4 (0.6%)                  | 0 (0.0%)                                                         | 1 (0.3%)                                      |
| Missing                                         | 0 (0.0%)                  | 1 (0.4%)                                                         | 1 (0.3%)                                      |
| Asthma                                          |                           |                                                                  |                                               |
| Yes                                             | 34 (5.1%)                 | 13 (5.5%)                                                        | 24 (6.1%)                                     |
| No                                              | 634 (94.3%)               | 217 (92.3%)                                                      | 363 (91.9%)                                   |
| Unknown                                         | 3 (0.4%)                  | 4 (1.7%)                                                         | 7 (1.8%)                                      |
| Missing                                         | 1 (0.1%)                  | 1 (0.4%)                                                         | 1 (0.3%)                                      |

Abbreviations: FEV<sub>1</sub>, forced expiratory volume in 1 second; FVC, forced vital capacity.

**Table S2.** Crude association for each breathlessness dimension with physical or mental quality of life (QoL) assessed using the Short Form 12 (SF-12)

|                                 | <b>Association with physical QoL<br/>Beta (95% CI)</b> | <b>Association with mental QoL<br/>Beta (95% CI)</b> |
|---------------------------------|--------------------------------------------------------|------------------------------------------------------|
| <b>D-12</b>                     |                                                        |                                                      |
| Total score                     | -0.44 (-0.51 to -0.38)                                 | -0.32 (-0.39 to -0.25)                               |
| Physical score                  | -0.44 (-0.50 to -0.37)                                 | -0.31 (-0.38 to -0.24)                               |
| Affective score                 | -0.38 (-0.44 to -0.31)                                 | -0.30 (-0.37 to -0.23)                               |
| <b>MDP</b>                      |                                                        |                                                      |
| A1 unpleasantness score         | -0.40 (-0.46 to -0.33)                                 | -0.31 (-0.38 to -0.23)                               |
| Perception score                | -0.38 (-0.44 to -0.31)                                 | -0.29 (-0.36 to -0.22)                               |
| Emotional response score        | -0.29 (-0.36 to -0.22)                                 | -0.47 (-0.54 to -0.41)                               |
| <b>Descriptors</b>              |                                                        |                                                      |
| Muscle work or effort           | -0.28 (-0.35 to -0.21)                                 | -0.26 (-0.33 to -0.18)                               |
| Air hunger                      | -0.29 (-0.37 to -0.22)                                 | -0.24 (-0.31 to -0.17)                               |
| Chest tightness or constriction | -0.27 (-0.34 to -0.20)                                 | -0.26 (-0.33 to -0.19)                               |
| Mental effort or concentration  | -0.27 (-0.34 to -0.20)                                 | -0.27 (-0.34 to -0.20)                               |
| Breathing a lot                 | -0.25 (-0.32 to -0.18)                                 | -0.21 (-0.29 to -0.14)                               |
| <b>Emotional responses</b>      |                                                        |                                                      |
| Depression                      | -0.20 (-0.27 to -0.13)                                 | -0.53 (-0.59 to -0.46)                               |
| Anxiety                         | -0.24 (-0.31 to -0.16)                                 | -0.51 (-0.57 to -0.44)                               |
| Frustration                     | -0.29 (-0.36 to -0.22)                                 | -0.40 (-0.47 to -0.34)                               |
| Anger                           | -0.22 (-0.29 to -0.15)                                 | -0.37 (-0.44 to -0.30)                               |
| Fright                          | -0.24 (-0.31 to -0.16)                                 | -0.46 (-0.53 to -0.39)                               |

To be able to compare the strengths of the associations between the different scales, all scores were log transformed (to yield more normal distributions) and analyzed as z-scores. Associations are analyzed for each breathlessness score separately using uni-variable linear regression.
